# Aberrant endoplasmic reticulum stress response in lymphoblastoid cells from patients with bipolar disorder

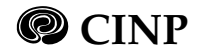

Akiko Hayashi<sup>1</sup>, Takaoki Kasahara<sup>1</sup>, Mizue Kametani<sup>1</sup>, Tomoko Toyota<sup>2</sup>,  
Takeo Yoshikawa<sup>2</sup> and Tadafumi Kato<sup>1</sup>

<sup>1</sup> Laboratory for Molecular Dynamics of Mental Disorders, RIKEN Brain Science Institute, Japan

<sup>2</sup> Laboratory for Molecular Psychiatry, RIKEN Brain Science Institute, Japan

## Abstract

Impaired endoplasmic reticulum (ER) stress response has been suggested as a possible pathophysiological mechanism of bipolar disorder (BD). The expression of ER stress-related genes, spliced form or unspliced form of XBP1, GRP78 (HSPA5), GRP94 (HSP90B1), CHOP (DDIT3), and calreticulin (CALR), were examined in lymphoblastoid cells derived from 59 patients with BD and 59 age- and sex-matched control subjects. Basal mRNA levels and induction by 4 h or 12 h of treatment with two ER stressors, thapsigargin or tunicamycin, were examined using real-time quantitative reverse transcription–polymerase chain reaction. Induction of the spliced form of XBP1 as well as total XBP1 by thapsigargin was significantly attenuated in patients with BD. Induction of GRP94 by thapsigargin was also decreased in the BD group. A haplotype of GRP94, protective against BD, exhibited significantly higher GRP94 expression upon ER stress. This report confirms and extends earlier observations of impaired ER stress response in larger samples of lymphoblastoid cell lines derived from BD patients. Altered ER stress response may play a role in the pathophysiology of BD by altering neural development and plasticity.

Received 23 January 2008; Reviewed 29 April 2008; Revised 13 July 2008; Accepted 4 August 2008;

First published online 4 September 2008

**Key words:** Bipolar disorder, calcium homeostasis, endoplasmic reticulum stress, lymphoblastoid cells, GRP94, XBP1.

## Introduction

Bipolar disorder (BD) is a severe mental illness characterized by recurrent episodes of mania and depression that affects about 1% of the population (Goodwin and Jamison, 2007). Although genetic factors contribute to the onset of this illness, genetic risk factors or causative genes have not been elucidated (Kato, 2007). Studies of action mechanisms of mood stabilizers revealed that both lithium and valproate have direct actions on neurons, including protection of neurons from cell death or enhancement of neurogenesis (Chuang, 2005; Manji and Duman, 2001). Among the findings obtained from neuroimaging studies of BD, increased incidence of white-matter

hyperintensity is one of the most replicated findings (Altshuler et al., 1995); a meta-analysis showed that 9 out of 10 studies supported this finding (Videbech, 1997). Because this finding is a non-specific finding and there is no specific brain region, the infarction of which causes bipolar disorder, it would be more reasonable to assume that the hyperintensity lesion is not a causative factor but that brain cells of patients with bipolar disorder are more vulnerable to mild hypoxia. Decreased levels of *N*-acetylaspartate in the brain also suggest impaired integrity of neurons of BD patients (Stork and Renshaw, 2005). A study using olfactory neuroepithelium showed that cells derived from BD patients were more vulnerable to cell death (McCurdy et al., 2006). Studies of peripheral blood cells showed increased levels of calcium in platelets, lymphocytes and lymphoblastoid cells (reviewed by Warsh et al., 2004). These findings together suggest that BD patients have some vulnerability or impaired resilience at the cellular level (Kato, 2008; Shaltiel et al., 2007).

Address for correspondence: Dr T. Kato, Laboratory for Molecular Dynamics of Mental Disorders, RIKEN Brain Science Institute, Hirosawa 2-1, Wako-shi, Saitama 351-0198, Japan.  
Tel.: +81-48-467-6949 Fax: +81-48-467-6947  
E-mail: kato@brain.riken.jp

However, the actual mechanism of such cellular impairment, if any, has not been elucidated. Suggested mechanisms for the effects of mood stabilizers on neurons include, among others, depletion of inositol (Williams et al., 2002), up-regulation of bcl-2 on mitochondrial outer membrane (Chen et al., 1999b), up-regulation of endoplasmic reticulum (ER) chaperones (Chen et al., 2000), and inhibition of GSK-3 $\beta$  (Chen et al., 1999a) effects on the extracellular signal-regulated kinase (ERK) pathway (Yuan et al., 2001). It is still unknown which of these mechanisms has the most important effect on BD and it remains to be clarified what signal cascade is impaired in the cells of BD patients.

To address this question systematically, we previously used DNA microarray analysis of lymphoblastoid (LB) cells derived from two pairs of monozygotic twins discordant with respect to BD and found down-regulated expression of *XBP1* and *GRP78* (*HSPA5*) in both affected twins (Kakiuchi et al., 2003). Because both of these genes are related to the ER stress response pathway, we focused on this pathway as a possible molecular cascade responsible for BD.

ER is a site of synthesis, folding, and modification of secretory and cell surface proteins (Yoshida, 2007), and this organelle is widely distributed throughout neurons (Murakami et al., 2007). Various cellular insults or increased demands of protein synthesis cause accumulation of unfolded proteins in the ER lumen. This condition is designated as ER stress. Unfolded protein response (UPR) is one of the adaptive responses by which cells protect themselves from ER stress. UPR consists of four signalling cascades: (1) induction of ER chaperones, e.g. GRP78 (also named HSPA5 or BiP), GRP94 (HSP90B1), calreticulin (CALR), which promotes the folding of unfolded proteins; (2) inhibition of protein synthesis; (3) induction of an ER-associated degradation pathway; and (4) induction of CHOP, a transcription factor implicated in ER stress-induced apoptosis.

XBP1 is a pivotal transcription factor that plays a crucial role in the induction of ER chaperones such as GRP78 and GRP94 (Lee et al., 2002; Yoshida et al., 2001). With ER stress, IRE1 $\alpha$ , an endoribonuclease on ER membranes, cleaves a 26-nt fragment from an unspliced form of *XBP1* mRNA (*XBP1u*), inducing a frame shift of the open reading frame of the message. XBP1 protein encoded by the spliced mRNA (*XBP1s*) is a potent transcription factor inducing the expression of ER chaperone genes.

Several lines of evidence support the involvement of UPR dysfunction in the pathophysiology of BD. Pharmacological studies suggested that ER chaperones such as *GRP78*, *GRP94*, and *CALR* are target

**Table 1.** Characteristics of the subjects

|                                 | Control        | Bipolar disorder |                |                |
|---------------------------------|----------------|------------------|----------------|----------------|
|                                 |                | Total            | BP I           | BP II          |
| <i>n</i>                        | 59             | 59               | 43             | 16             |
| Gender                          | 34 M, 25 F     | 35 M, 24 F       | 31 M, 12 F     | 4 M, 12 F      |
| Age, yr<br>(mean $\pm$<br>s.d.) | 47.9 $\pm$ 1.6 | 46.1 $\pm$ 1.6   | 45.5 $\pm$ 2.0 | 47.6 $\pm$ 3.6 |

genes of the mood stabilizers valproate (Chen et al., 2000) and lithium (Shao et al., 2006). The antimalarial drug mefloquine, which is known to cause BD in susceptible individuals, causes ER stress (Dow et al., 2003). Serotonergic stimulation or immobilization stress activates *XBP1* splicing (Toda et al., 2006). Frequent comorbidity of mood disorders has been reported in Wolfram syndrome (Swift and Swift, 2000) caused by mutations of *WFS1* that encodes an ER stress-related protein (Fonseca et al., 2005) regulated by XBP1 (Kakiuchi et al., 2006).

We found that up-regulation of *XBP1* and *GRP78* in response to ER stress caused by thapsigargin treatment was attenuated in the cells derived from BD patients and identified that a single nucleotide polymorphism (SNP), '–116C>G' on the promoter region of *XBP1* (rs2269577) that removes the XBP1-binding sequence significantly attenuated this response (Kakiuchi et al., 2003). The attenuated *XBP1* response was partially rescued by valproate treatment. Although we initially reported that this SNP (rs2269577) was significantly associated with BD, this association was not replicated by subsequent studies (Cichon et al., 2004; Hou et al., 2004). We also reported that genetic variants of *GRP78* (*HSPA5*) (Kakiuchi et al., 2005) and *GRP94* (*HSP90B1*) (Kakiuchi et al., 2007) were associated with BD in Japanese individuals.

Recently, So and colleagues reported that LB cells derived from BD patients showed a striking decrease in the response of *XBP1* and *CHOP* to two ER stressors, thapsigargin and tunicamycin (So et al., 2007). The induction of *GRP78* did not differ from controls. To confirm and extend this finding in a relatively small number of samples (20 patients with bipolar I disorder and 10 healthy controls), we measured the induction of major UPR-related genes, spliced or unspliced forms of *XBP1*, *GRP78*, *GRP94*, *CHOP*, and *CALR* in response to ER stress, in more than 100 LB cells (obtained from 59 healthy individuals and 59 BD patients).

## Methods

### Subjects

The study included 59 unrelated BD patients [43 with bipolar I disorder (BD I) and 16 with bipolar II disorder (BD II) and 59 age- and sex-matched unrelated healthy controls (Table 1). Patients were diagnosed according to the DSM-IV criteria by the consensus of at least two psychiatrists. Structured interviews were not used for the diagnosis, although we began to use a structured interview, the Mini-International Neuropsychiatric Interview (MINI) (Sheehan et al., 1998) for recently recruited patients ( $n=22$ ). Family history was obtained by an interview of the patient and available family members. Nineteen of the patients had a family history of mood disorder within first-degree relatives. Eleven of the patients had a history of psychotic features. Average age at onset was 32.2 yr (s.d. = 14.2, range 15–85). Controls were selected from students, nurses, office workers, and doctors at participating institutes along with their friends. A senior psychiatrist interviewed them and assessed them as healthy. Written informed consent was obtained from all participants. Although diabetes mellitus was not an exclusion criterion, none of the subjects had diabetes mellitus. Family history of diabetes mellitus was not assessed in the subjects. The Research Ethics Committee of RIKEN approved the study.

### Cell cultures and drug treatment

Lymphocytes were separated from the peripheral blood and transformed by Epstein–Barr virus. LB cells were cultured in RPMI 1640 (Sigma; St Louis, MO, USA) containing 10% fetal bovine serum (FBS) as described previously (Kato et al., 2003). All LB cells were used after two rounds of freezing and reculturing.

For induction of ER stress, we incubated LB cells with thapsigargin (0.3  $\mu\text{M}$ ) or tunicamycin [2.38  $\mu\text{M}$  (2  $\mu\text{g}/\text{ml}$ )] for either 4 h or 12 h. We selected these time-points because 4 h is the peak of *XBPI* splicing and *XBPIu* expression, and 12 h is the peak of GRP78 expression. Thapsigargin inhibits the sarcoplasmic/ER  $\text{Ca}^{2+}$  ATPase (SERCA) leading to a rise in the cytosolic  $\text{Ca}^{2+}$  level and reduction in the ER  $\text{Ca}^{2+}$  level (Treiman et al., 1998). Tunicamycin prevents the glycosylation of newly synthesized proteins in the ER, causing the accumulation of unfolded proteins in the ER (Tordai et al., 1995). The same quantity of dimethylsulfoxide in the medium was added as vehicle control (0.5 ml in 10 ml medium). All experimental procedures and data analyses were performed blindly to the diagnosis or any other clinical variables.

### RNA extraction and real-time quantitative reverse transcription–polymerase chain reaction (RT–PCR)

Total RNA was prepared from LB cells using TRIzol reagent (Invitrogen, San Diego, CA, USA), followed by DNase I (Takara Bio, Shiga, Japan) treatment to exclude genomic DNA. The SuperScriptII first-strand synthesis system with oligo(dT) (Invitrogen) was used to synthesize cDNA according to the manufacturer's instructions. Resulting cDNAs were subjected to a TaqMan RT–PCR assay (Applied Biosystems, Foster City, CA, USA) for the quantification of mRNA levels. The primer sequences were as follows: (sense) 5'-GGTCCAAGTTGTCCAGAATGC-3' [spliced form of *XBPI*, (*XBPIs*)], 5'-CTCAGACTACGTGCACCTCTGC-3' [unspliced form of *XBPI*, (*XBPIu*)]; (antisense) 5'-GCCAGTGGCCGGTCT-3' (*XBPIs*), 5'-AGTCAA-TACCGCCAGAATCCAT-3' (*XBPIu*); (FAM-labelled probe): 5'-CCTGCACCTGCTGCGGACTCAGC-3' (*XBPIs*), and 5'-CAGGTGCAGGCCAGTTGTCACC-3' (*XBPIu*). To validate the *XBPI* variant specificity of each probe set, an external control standard curve was determined by PCR with the serial dilution of pcDNA/human *XBPIs* or pcDNA/human *XBPIu* plasmid as template. To test the degree of cross-reaction, we also performed quantitative PCR with the *XBPIs* plasmid template and *XBPIu*-specific probe, or with the *XBPIu* plasmid template and *XBPIs*-specific probe. These standard curves displayed a linear relationship between  $C_t$  values and the logarithm of the input plasmid amounts (Figure S1, see Supplementary Online Appendix). Although PCR efficiency of the undesirable cross-reaction was considerably less than the specific reaction, the contribution of the cross-reaction was subtracted from the absolute value estimated by the specific reaction. All other assays were performed using the Assay-on-Demand service (Applied Biosystems); GRP94 (Assay ID, Hs00427665\_g1), GRP78 (Hs00607129\_gH), CALR (Hs00189032\_m1), CHOP (Hs00358796\_g1), and GAPDH (Hs99999905\_m1). We measured the  $\Delta C_t = C_t$  (each gene) –  $C_t$  (*GAPDH*) for each sample in quadruplicate. The relative expression level was calculated by  $2^{-\Delta C_t}$ . The fold change was defined by the ratio of the relative expression level after stimulation by thapsigargin or tunicamycin to the basal relative expression level.

### Genotyping of *XBPI*, GRP78, and GRP94

Genomic DNA was extracted from LB cells using standard protocols. Polymorphisms of *XBPI* (rs2269577), *GRP78* (*HSPA5*) (rs391957, rs17840761, and rs16927997), and *GRP94* (*HSP90B1*) (rs1165681 and rs17034977)

**Table 2.** Levels of unfolded protein response related genes at baseline

|                                      | Control ( <i>n</i> = 59) |         | Bipolar disorder ( <i>n</i> = 59) |         | <i>p</i> value |
|--------------------------------------|--------------------------|---------|-----------------------------------|---------|----------------|
|                                      | Mean                     | s.d.    | Mean                              | s.d.    |                |
| <i>XBP1s</i>                         | 0.038                    | 0.016   | 0.042                             | 0.017   | 0.197          |
| <i>XBP1u</i>                         | 0.088                    | 0.037   | 0.105                             | 0.063   | 0.071          |
| <i>XBP1t</i>                         | 0.125                    | 0.052   | 0.148                             | 0.074   | 0.089          |
| Ratio of <i>XBP1s</i> / <i>XBP1u</i> | 0.428                    | 0.057   | 0.425                             | 0.060   | 0.761          |
| <i>GRP78</i>                         | 0.059                    | 0.020   | 0.055                             | 0.015   | 0.211          |
| <i>CHOP</i>                          | 0.00080                  | 0.00034 | 0.00080                           | 0.00021 | 0.527          |
| <i>GRP94</i>                         | 0.022                    | 0.010   | 0.022                             | 0.009   | 0.892          |
| <i>CALR</i>                          | 0.153                    | 0.040   | 0.145                             | 0.041   | 0.392          |

All genes were normalized by GAPDH.

*p* value: Comparison of two groups by Mann–Whitney *U* test.

were genotyped by commercially available *TaqMan* SNP genotyping assays.

In our previous paper, a haplotype (CGCTT) of five SNPs, rs1165687, rs1882019, rs17034977, rs703657, and rs2293618, in the *GRP94* gene was reported as a protective haplotype against BD. This haplotype was divided into two haplotypes based on the other upstream SNP (rs1165681), C-CGCTT and T-CGCTT. C-CGCTT was more strongly associated with BD ( $p=0.0000037$ , in comparison with the association with entire CGCTT,  $p=0.00094$ ) (C. Kakiuchi et al., unpublished observations). In this study, we genotyped two SNPs, rs1165681 and rs17034977, to determine this 6-marker haplotype. This haplotype associated with BD (C-CGCTT) was named ‘haplotype C-3’.

Genotyping was performed by ABI7900HT according to the protocol recommended by the manufacturer (Applied Biosystems).

### Statistical analysis

The Mann–Whitney *U* test and Kruskal–Wallis test were used because these tests are robust to deviation from the normal distribution;  $p < 0.05$  was considered as significant. Multiple statistical analysis was not corrected because this study is based on a hypothesis and intended to replicate the previously reported findings. For the analysis of the effect of clinical variables, Spearman’s coefficient of correlation was also used.

To test the effect of confounding factors, two-way analysis of covariance (two-way ANCOVA) with factors of diagnosis (d.f. = 1, BD or control) and sex (d.f. = 1), and a covariance of age was applied. To test the interactions between the genotype and other factors, three-way ANCOVA with the factors of

genotype (d.f. = 2 for *XBP1* –116C/G polymorphism and d.f. = 1 for *GRP94* haplotype), diagnosis (d.f. = 1), sex (d.f. = 1), and a covariant of age was applied. When a significant interaction between genotype and diagnosis was found, one-way ANOVA was applied to each group (BD or control). When a significant effect of genotype was found by one-way ANOVA, multiple comparison by Bonferroni correction was applied. These statistical analyses were performed by SPSS for Windows version 11.0 (SPSS Japan, Tokyo).

## Results

### Baseline

At baseline, no differences in the mRNA levels of *XBP1t* (total *XBP1*), *XBP1s*, *XBP1u*, *GRP94*, *GRP78*, *CALR*, and *CHOP* were found between BD patients and controls (Table 2). A significant effect of sex was found for *XBP1s*, *XBP1u*, *XBP1t*, ratio of *XBP1s*/*XBP1u*, *CHOP*, and *GRP94* using two-way ANOVA (Tables S1, S2, online). No other main effects and interactions were statistically significant.

### *XBP1*

The up-regulation of ER stress-related genes in response to thapsigargin and tunicamycin was examined by real-time RT–PCR. In the presence of thapsigargin or tunicamycin, expression of *XBP1t* increased by approximately 150% after 4 h of drug application and increased expression continued, to a lesser degree, at 12 h.

The thapsigargin-induced increase of *XBP1t* at 12 h was significantly lower in the BD group than in the control group (Figure 1a,d;  $p=0.019$  in

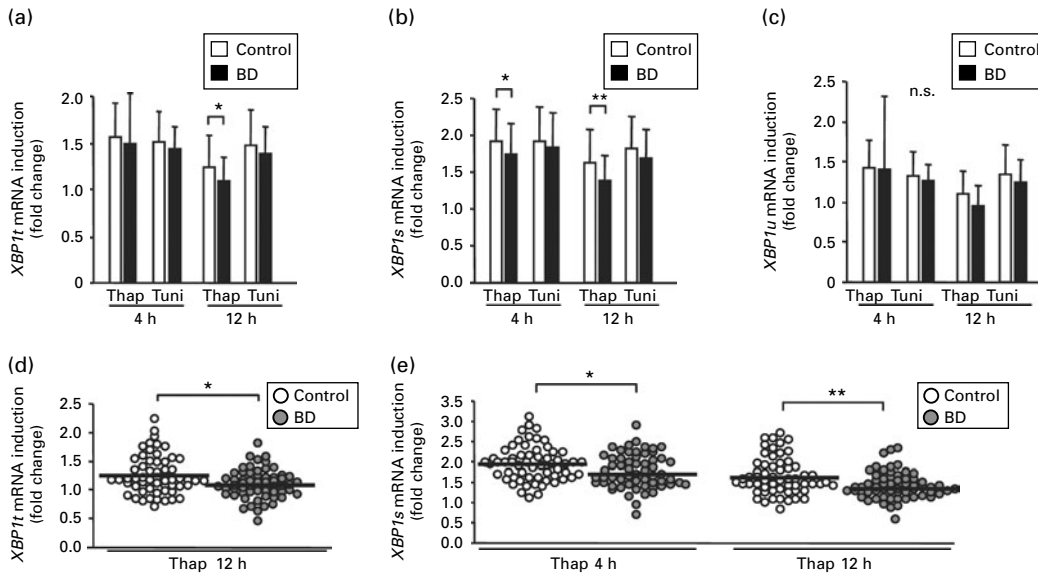

**Figure 1.** Altered endoplasmic reticulum (ER) stress-induced expression of *XBP1* mRNA in patients with bipolar disorder (BD). Bars represent means  $\pm$  s.d. n.s., Not significant; \*  $p < 0.05$ , \*\*  $p < 0.01$  by Mann–Whitney *U* test. *XBP1t*, *XBP1* total; *XBP1s*, spliced form of *XBP1*; *XBP1u*, unspliced form of *XBP1*. Thap, thapsigargin; Tuni, tunicamycin. Bars in panels (d) and (e) represent the average.

Mann–Whitney *U* test). Similarly, the BD group exhibited significantly reduced induction of *XBP1s* at both 4 h and 12 h (Figure 1b,e;  $p = 0.027$ ,  $p = 0.008$  in Mann–Whitney *U* test, respectively). There was no significant difference in *XBP1u* induction between BD patients and controls (Figure 1c). Two-way ANCOVA showed a significant main effect of diagnosis, but not sex, for these parameters (*XBP1t* 12 h after thapsigargin, *XBP1s* 4 h after thapsigargin, and *XBP1s* 12 h after thapsigargin) and *XBP1u* 12 h after thapsigargin (Table S1, online).

There was no statistically significant difference of *XBP1* inductions between the genotypes of *XBP1* –116 C/G polymorphism (C/C,  $n = 12$ ; C/G,  $n = 45$ ; G/G,  $n = 61$ , Kruskal–Wallis test,  $p > 0.05$ ). Three-way ANCOVA showed a significant interaction between diagnosis and genotype for *XBP1t* 12 h after tunicamycin. A trend of diagnosis  $\times$  genotype interaction was found for *XBP1s* 12 h after tunicamycin, and *XBP1u* 4 h after tunicamycin (Table S3, online, Figure 2).

### GRP94

*GRP94* induction 12 h after thapsigargin treatment was also significantly reduced in BD patients (Figure 3a,b). Two-way ANCOVA also revealed a significant effect of diagnosis ( $p = 0.005$ ), but not sex, on *GRP94* induction (Table S1, online).

We previously reported that the haplotype of *GRP94* was associated with BD, which was replicated

in two independent Japanese sample sets (Kakiuchi et al., 2007). The protective haplotype (haplotype C-3) was determined by two SNPs (rs1165681 and rs17034977). The LB cells with haplotype C-3 exhibited significantly higher *GRP94* induction than those without this haplotype (Figure 3c;  $p = 0.013$  in Mann–Whitney *U* test). There was a trend of lower basal level of *GRP94* in subjects with haplotype C-3 ( $n = 17$ ,  $0.0186 \pm 0.0072$ ) compared to those without haplotype C-3 ( $n = 101$ ,  $0.0226 \pm 0.0097$ ,  $p = 0.093$ ). The single SNP genotype of rs17034977 did not show significant effect on the basal *GRP94* level and fold change of *GRP94* response.

Three-way ANCOVA with factors of *GRP94* haplotype, diagnosis, sex, and a covariate of age showed a trend level effect of *GRP94* haplotype for basal level of *GRP94* (Table S3, online), but there was not significant interaction between *GRP94* haplotype and diagnosis for basal *GRP94* levels and *GRP94* induction.

### Other UPR-related genes

There was no significant difference in the response of *GRP78*, *CALR*, and *CHOP* between BD patients and controls (Figure 4). *GRP78* has four haplotypes, among which haplotype 4 was reported to be associated with BD in the Japanese population. Although we compared the induction of *GRP78* with or without haplotype 4, no significant difference was observed (data not shown).

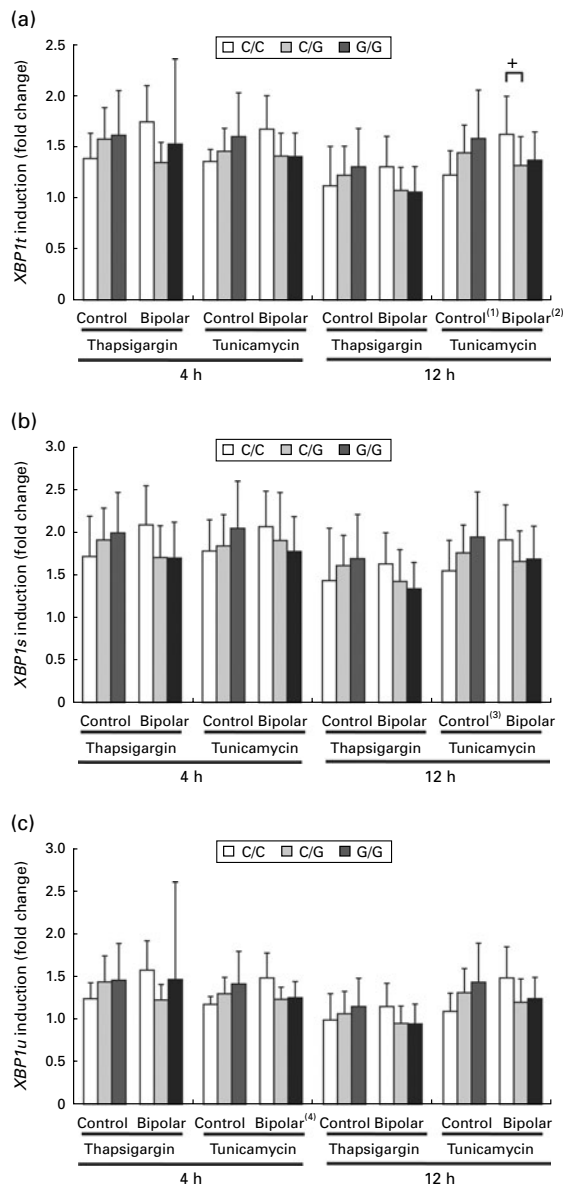

**Figure 2.** Effect of *XBP1* -116 polymorphism on XBP1 induction. Bars represent means  $\pm$  S.D. *XBP1t*, *XBP1* total; *XBP1s*, spliced form of *XBP1*. Superior numbers indicate significance or a trend of genotype effect observed by one-way ANOVA. (1)  $F=2.548$ ,  $p=0.087$ , (2)  $F=2.543$ ,  $p=0.088$ , (3)  $F=2.567$ ,  $p=0.086$ , (4)  $F=4.307$ ,  $p=0.018$ . +  $p < 0.10$  by multiple comparison by Bonferroni method.

### Effects of clinical parameters

Effect of clinical variables on the ER stress response was examined. There was no significant relationship between age at onset and any of the gene expression parameters in the BD group ( $p > 0.05$ ). None of the parameters was significantly different between the patients with and without a history of psychosis

( $p > 0.05$ ). With regard to family history, several parameters showed nominally significant difference between patients with and without a family history. Especially, response of CHOP to both thapsigargin and tunicamycin was significantly different between the two groups. Patients with a family history showed significantly smaller response to these two agents compared to those without a family history (Table S4, online).

### Discussion

We found that induction of *XBP1t* and *XBP1s* by thapsigargin was significantly reduced in the BD group in accordance with previous findings (Kakiuchi et al., 2003; So et al., 2007) (Figure 1). We also found that induction of an ER chaperone gene, *GRP94* (*HSP90B1*), in response to thapsigargin was also attenuated in BD (Figure 3). There was a non-significant tendency of higher basal expression levels of *XBP1s*, *XBP1u*, and *XBP1t* in BD patients (Table 2). These expression levels were statistically significantly higher in BD I patients compared to controls. These findings imply that LB cells from BD, especially BD I, might mildly but constitutively suffer from ER dysfunction even in the basal condition and could not trigger enough appropriate *XBP1* response to maintain ER homeostasis on stress condition. The results should be interpreted with caution, because the patient group is heterogeneous, and LB cells are polyclonal. The major strength of this study, in contrast to previous studies, is the use of a relatively large number of LB cells and the carefully designed measurement method for the distinction between *XBP1s* and *XBP1u* mRNAs (Figure S1, online).

We previously reported that this polymorphism on the promoter region of *XBP1* removes the binding site of XBP1 itself and compromises the *XBP1* induction in response to ER stress (Kakiuchi et al., 2003). In our previous study, induction of *XBP1t* 3 h after the 300-nM thapsigargin stimulation was 2.6-fold in C/C genotype cells of control subjects. In the study by So et al. (2007) it was 5-fold in the control cells with C/C genotype 6 h after the 300-nM thapsigargin treatment. In contrast, the induction of *XBP1t* after the 4-h treatment with 300 nM thapsigargin in the present study was only 1.5-fold in the cells with the same genotype. This was similar to or even lower than that in the G/G cells in previous studies. Thus, the XBP1 loop showed a different functional status in the present experimental conditions in comparison with the previous studies. In this study, we used the cells after two rounds of freezing and reculturing. Our preliminary

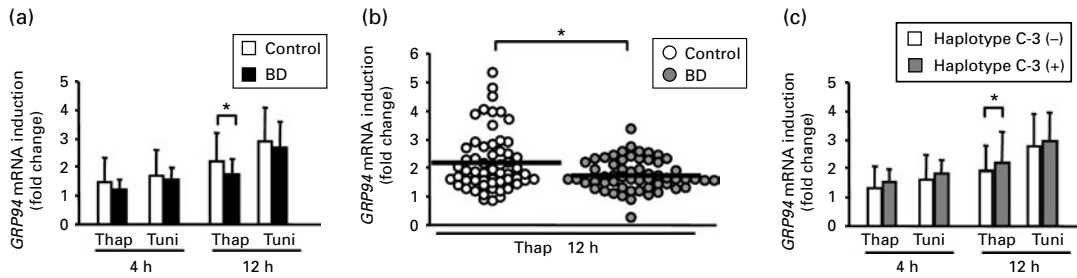

**Figure 3.** Induction of *GRP94* in lymphoblastoid cells. (a, b) Altered endoplasmic reticulum (ER) stress-induced expression of *GRP94* mRNA in patients with bipolar disorder (BD). (c) Difference of thapsigargin-induced *GRP94* response between the subjects with haplotype C-3 of *GRP94* ( $n=17$ ) and those without haplotype C-3 ( $n=101$ ). Bars represent means  $\pm$  s.d. \*  $p < 0.05$ , by Mann-Whitney *U* test. Thap, thapsigargin; Tuni, tunicamycin.

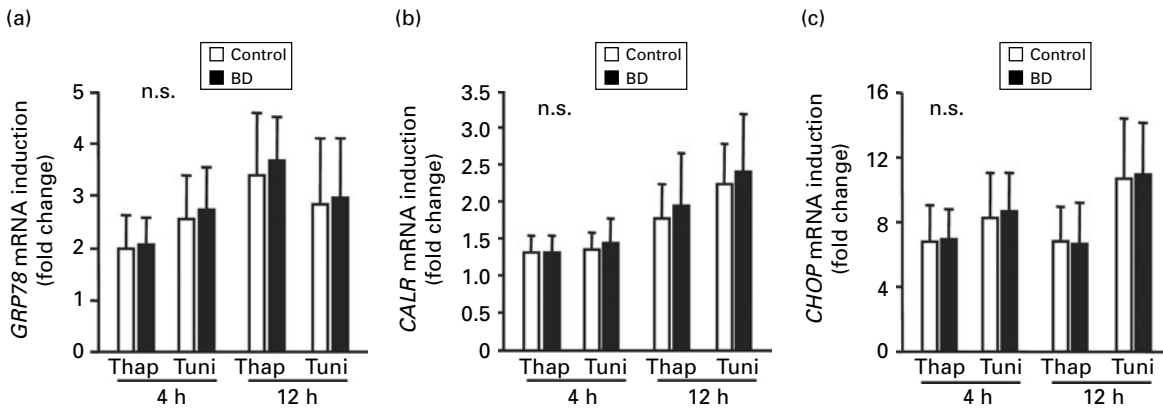

**Figure 4.** Induction of *GRP78*, *CALR*, and *CHOP* in lymphoblastoid cells. Bars represent means  $\pm$  s.d. n.s., Not significant; BD, Bipolar disorder; Thap, thapsigargin; Tuni, tunicamycin.

experiment showed that *XBP1t* response to thapsigargin was attenuated after the freezing and reculturing process (Figure S2, online). Despite this limitation, we used the cells after two rounds of freezing and reculturing to increase the sample size, because only such cells were available for many of the previously collected cell lines. Although the molecular mechanism of alterations in the UPR in LB cells after freezing and reculturing is unknown, freezing of the cells may cause unfolding of the proteins resulting in ER stress. Caution should be exercised in directly comparing the results of the present study with those of previous studies.

It is of interest that we were able to observe the difference in *XBP1* response to thapsigargin between BD patients and controls even in those cells with compromised *XBP1* response. The present findings, together with the finding by So et al. (2007) indicate that the effect of BD on the response of *XBP1* to ER stress surpasses the effect of the *XBP1* polymorphism, and impaired *XBP1* response to ER stress in BD cannot be solely attributable to this promoter SNP.

An unexpected finding was the significant interaction between diagnosis and *XBP1* genotype for *XBP1* induction by tunicamycin. This interaction seems to be mediated by the opposite relationship of genotype and *XBP1* response between BD patients and controls (Figure 2a). The *XBP1* promoter undergoes complex regulation. NF- $\kappa$ B is constitutively bound to the *XBP1* promoter (Donati et al., 2006), and interacts with ATF6 (Yoshida et al., 2000). Many other transcription factors were also found to bind to the *XBP1* promoter by chromatin immunoprecipitation assay (Donati et al., 2006). *XBP1* itself is one of the transcription factors that directly bind to *XBP1* promoter (Acosta-Alvear et al., 2007; Donati et al., 2006). *XBP1* expression is also epigenetically regulated by histone acetylation (Donati et al., 2006). Donati and colleagues hypothesized that *XBP1u* protein, an inactive transcription factor, is constitutively bound to *XBP1* promoter, and this is replaced by *XBP1s*, an active transcription factor upon ER stress (Donati et al., 2006). The differential response to ER stress may be caused by the difference in transcription factors bound to the *XBP1* promoter. Further

studies will be needed to understand this complex relationship between genotype and diagnosis.

On the other hand, the protective haplotype of *GRP94* against BD (Kakiuchi et al., 2007) displayed significantly higher induction of *GRP94* in the presence of thapsigargin, suggesting that the increased mRNA expression by the associated haplotype could be an underlying protective mechanism for BD. The present findings suggest that the UPR dysfunction in BD is not limited to the impaired feedback loop of *XBP1* as suggested by our previous study but might reflect broader dysfunction of this pathway.

It should be noted that several BD patients were outliers ( $p < 0.10$  by Smirnov–Grubbs test) with regard to the *XBP1* or *GRP94* induction (Figures 1 and 3). A recent whole genome association study did not find genes robustly associated with BD (Wellcome Trust Case Control Consortium, 2007). The effect of copy number variations (CNVs) on the inter-individual variations of gene expression levels cannot be overlooked (Stranger et al., 2007). In this situation, the role of multiple rare variants in the pathophysiology of BD is revisited (Kato, 2007). It is possible that not only the combination of common SNPs but also rare mutations or CNVs of the genes in the UPR pathway might contribute to the reduced ER stress response in BD. Although the large number of molecules participating in this pathway hampers the re-sequencing study, recent innovation in re-sequencing technology will enable a search for rare mutations in this pathway in the near future.

It is unknown why other transcription target genes of *XBP1*, such as *GRP78*, *CALR*, and *CHOP*, were not altered in LB cells from BD patients. Our finding is in contrast to the results of Kakiuchi et al. (2003), who showed reduced induction of *GRP78* in response to thapsigargin, and So et al. (2007), who reported reduced *CHOP* expression in response to thapsigargin and tunicamycin in LB cells derived from BD patients. These discrepancies are probably due to the difference of the culture conditions or patient population. Although we did not find a significant difference of *CHOP*, we found a significant effect of family history on the response of *CHOP*. *CHOP* response was significantly smaller in patients with a family history. This may be relevant to the data of So et al. The discrepancy in the *GRP78* response between this study and Kakiuchi et al. (2003) may be due to the difference in the number of freeze and reculture, because *GRP78* response was enhanced after this process (Figure S2, online).

Although these genes have a *cis*-acting ER stress response element (ERSE) in their promoter, to which

*XBP1* directly binds (Yamamoto et al., 2004), these genes are not regulated solely by *XBP1*. There might be complicated and parallel signalling pathways for the regulation of these genes.

BD should be caused primarily by brain dysfunction. Thus, it is unlikely that changes of *XBP1* and *GRP94* in peripheral blood cells directly cause neurological dysfunction. However, if the observed change in LB cells is the intermediate phenotype associated with genetic predisposition to BD, it seems plausible that such changes also occur in neuronal cells. There are three possible explanations for how impaired ER stress response is relevant to impaired neural function in BD: (1) roles of *XBP1* in neural development and plasticity, (2) roles of UPR in the maturation and trafficking of receptors, and (3) roles of ER chaperones in calcium signalling.

The first possibility was suggested by our recent finding that *XBP1* is dramatically spliced by application of brain-derived neurotrophic factor (BDNF) in mouse primary hippocampal neurons (Hayashi et al., 2007). We suggested that BDNF increases protein synthesis, which triggers the ER stress condition in neurites and induces *XBP1* splicing. BDNF-induced neurite extension and branching was impaired in neurons lacking in *XBP1*. Although it is an open question whether the neurons of BD patients have impaired *XBP1* induction in response to BDNF, the impaired UPR may be one of several factors that together disrupt neuroplastic responses in BD. Decreased levels of BDNF in the serum of BD patients also support this possibility (Cunha et al., 2006).

With regard to the second possibility, the roles of ER chaperones on the maturation of membrane proteins involved in neurotransmitter signalling have been recognized since the report on the role of *GRP78* in the function of the serotonin transporter (Tate et al., 1999). More recently, the requirement of *XBP1* for surface trafficking of *GLR-1*, a *C. elegans*, ionotropic glutamate receptor most similar to the mammalian AMPA receptor, has been reported (Shim et al., 2004).

ER stores  $\text{Ca}^{2+}$  that is used for  $\text{Ca}^{2+}$  signals (Meldolesi and Pozzan, 1998). Most of the ER chaperones such as *GRP78* and *GRP94* have  $\text{Ca}^{2+}$ -binding capacity, which regulates  $\text{Ca}^{2+}$  flux (Yu et al., 1999). ER regulates functional and structural changes in neural circuits in both the developing and adult nervous systems by controlling the levels of cytoplasmic free  $\text{Ca}^{2+}$  locally in growth cones and synaptic compartments. The third possibility is supported by this multiple evidence. Especially, elevated basal or agonist-stimulated intracellular  $\text{Ca}^{2+}$  levels were reported in the platelets or LB cells derived from BD



patients (Kato, 2008; Warsh et al., 2004). This might also reflect the altered  $\text{Ca}^{2+}$ -buffering capacity by ER chaperones. So and colleagues reported that there was no relationship between basal calcium levels and the impaired *XBP1* induction (So et al., 2007), which does not support this speculation. However, the sample size in their report was too small to draw a conclusion, and the basal calcium level may not be the sensitive index of altered ER calcium homeostasis in LB cells. In contrast to the findings of So et al., attenuated response was seen only for thapsigargin but not for tunicamycin in this study. However, So et al. also reported that attenuation of *XBP1* induction was more prominent for the thapsigargin stimulation (58–65% reduction) compared to tunicamycin treatment (42–54% reduction). Although the reason for this discrepancy is unknown, it is intriguing that only the response to thapsigargin, but not to tunicamycin, was impaired in BD in this study. This may also support a possibility that UPR dysfunction in BD is related to altered  $\text{Ca}^{2+}$  signalling.

Although it is unknown which mechanism plays a major role in the pathophysiology of BD, these findings suggest that impairment of UPR might be relevant to altered neural functions such as neural development and plasticity.

In the present study, controls were not interviewed by a structured interview. In addition, they were not screened for family history of mental disorders. Thus, the results should be treated with caution.

In summary, altered UPR may play a role in the pathophysiology of BD. Together with pharmacological studies suggesting that lithium and valproic acid up-regulate ER chaperones, UPR might be a potential therapeutic target for BD.

## Note

Supplementary material accompanies this paper on the Journal's website (<http://journals.cambridge.org>).

## Acknowledgements

This work was supported by grants to the Laboratory for Molecular Dynamics of Mental Disorders, RIKEN BSL, a Grant-in-Aid from the Japanese Ministry of Health and Labour, and a Grant-in-Aid from the Japanese Ministry of Education, Culture, Sports, Science and Technology.

## Statement of Interest

None.

## References

- Acosta-Alvear D, Zhou Y, Blais A, Tsikitis M, Lents NH, Arias C, Lennon CJ, Kluger Y, Dynlacht BD (2007). XBP1 controls diverse cell type- and condition-specific transcriptional regulatory networks. *Molecular Cell* 27, 53–66.
- Altschuler LL, Curran JG, Hauser P, Mintz J, Denicoff K, Post R (1995). T2 hyperintensities in bipolar disorder: magnetic resonance imaging comparison and literature meta-analysis. *American Journal of Psychiatry* 152, 1139–1144.
- Chen B, Wang JF, Young LT (2000). Chronic valproate treatment increases expression of endoplasmic reticulum stress proteins in the rat cerebral cortex and hippocampus. *Biological Psychiatry* 48, 658–664.
- Chen G, Huang LD, Jiang YM, Manji HK (1999a). The mood-stabilizing agent valproate inhibits the activity of glycogen synthase kinase-3. *Journal of Neurochemistry* 72, 1327–1330.
- Chen G, Zeng WZ, Yuan PX, Huang LD, Jiang YM, Zhao ZH, Manji HK (1999b). The mood-stabilizing agents lithium and valproate robustly increase the levels of the neuroprotective protein bcl-2 in the CNS. *Journal of Neurochemistry* 72, 879–882.
- Chuang DM (2005). The antiapoptotic actions of mood stabilizers: molecular mechanisms and therapeutic potentials. *Annals of the New York Academy of Sciences* 1053, 195–204.
- Cichon S, Buervenich S, Kirov G, Akula N, Dimitrova A, Green E, Schumacher J, Klopp N, Becker T, Ohlraun S, et al. (2004). Lack of support for a genetic association of the XBP1 promoter polymorphism with bipolar disorder in probands of European origin. *Nature Genetics* 36, 783–784; author reply 784–785.
- Cunha AB, Frey BN, Andreazza AC, Goi JD, Rosa AR, Gonçalves CA, Santin A, Kapczinski F (2006). Serum brain-derived neurotrophic factor is decreased in bipolar disorder during depressive and manic episodes. *Neuroscience Letters* 398, 215–219.
- Donati G, Imbriano C, Mantovani R (2006). Dynamic recruitment of transcription factors and epigenetic changes on the ER stress response gene promoters. *Nucleic Acids Research* 34, 3116–3127.
- Dow GS, Hudson TH, Vahey M, Koenig ML (2003). The acute neurotoxicity of mefloquine may be mediated through a disruption of calcium homeostasis and ER function in vitro. *Malaria Journal* 2, 14.
- Fonseca SG, Fukuma M, Lipson KL, Nguyen LX, Allen JR, Oka Y, Urano F (2005). WFS1 is a novel component of the unfolded protein response and maintains homeostasis of the endoplasmic reticulum in pancreatic beta-cells. *Journal of Biological Chemistry* 280, 39609–39615.
- Goodwin FK, Jamison KR (2007). *Manic-Depressive Illness: Bipolar Disorders and Recurrent Depression*, 2nd edn. New York: Oxford University Press.
- Hayashi A, Kasahara T, Iwamoto K, Ishiwata M, Kametani M, Kakiuchi C, Furuichi T, Kato T (2007).

- The Role of brain-derived neurotrophic factor (BDNF)-induced XBP1 splicing during brain development. *Journal of Biological Chemistry* 282, 34525–34534.
- Hou SJ, Yen FC, Cheng CY, Tsai SJ, Hong CJ** (2004). X-box binding protein 1 (XBP1) C-116G polymorphisms in bipolar disorders and age of onset. *Neuroscience Letters* 367, 232–234.
- Kakiuchi C, Ishiwata M, Hayashi A, Kato T** (2006). XBP1 induces WFS1 through an endoplasmic reticulum stress response element-like motif in SH-SY5Y cells. *Journal of Neurochemistry* 97, 545–555.
- Kakiuchi C, Ishiwata M, Nanko S, Kunugi H, Minabe Y, Nakamura K, Mori N, Fujii K, Umekage T, Tochigi M, et al.** (2005). Functional polymorphisms of HSPA5: possible association with bipolar disorder. *Biochemical and Biophysical Research Communications* 336, 1136–1143.
- Kakiuchi C, Ishiwata M, Nanko S, Kunugi H, Minabe Y, Nakamura K, Mori N, Fujii K, Umekage T, Tochigi M, et al.** (2007). Association analysis of HSP90B1 with bipolar disorder. *Journal of Human Genetics* 52, 794–803.
- Kakiuchi C, Iwamoto K, Ishiwata M, Bundo M, Kasahara T, Kusumi I, Tsujita T, Okazaki Y, Nanko S, Kunugi H, et al.** (2003). Impaired feedback regulation of XBP1 as a genetic risk factor for bipolar disorder. *Nature Genetics* 35, 171–175.
- Kato T** (2007). Molecular genetics of bipolar disorder and depression. *Psychiatry and Clinical Neurosciences* 61, 1–17.
- Kato T** (2008). Role of mitochondrial DNA in calcium signaling abnormality in bipolar disorder. *Cell Calcium* 44, 92–102.
- Kato T, Ishiwata M, Mori K, Washizuka S, Tajima O, Akiyama T, Kato N** (2003). Mechanisms of altered  $Ca^{2+}$  signalling in transformed lymphoblastoid cells from patients with bipolar disorder. *International Journal of Neuropsychopharmacology* 6, 379–389.
- Lee K, Tirasophon W, Shen X, Michalak M, Prywes R, Okada T, Yoshida H, Mori K, Kaufman RJ** (2002). IRE1-mediated unconventional mRNA splicing and S2P-mediated ATF6 cleavage merge to regulate XBP1 in signaling the unfolded protein response. *Genes Development* 16, 452–466.
- Manji HK, Duman RS** (2001). Impairments of neuroplasticity and cellular resilience in severe mood disorders: implications for the development of novel therapeutics. *Psychopharmacology Bulletin* 35, 5–49.
- McCurdy RD, Feron F, Perry C, Chant DC, McLean D, Matigian N, Hayward NK, McGrath JJ, Mackay-Sim A** (2006). Cell cycle alterations in biopsied olfactory neuroepithelium in schizophrenia and bipolar I disorder using cell culture and gene expression analyses. *Schizophrenia Research* 82, 163–173.
- Meldolesi J, Pozzan T** (1998). The endoplasmic reticulum  $Ca^{2+}$  store: a view from the lumen. *Trends in Biochemical Sciences* 23, 10–14.
- Murakami T, Hino SI, Saito A, Imaizumi K** (2007). Endoplasmic reticulum stress response in dendrites of cultured primary neurons. *Neuroscience* 146, 1–8.
- Shaltiel G, Chen G, Manji HK** (2007). Neurotrophic signaling cascades in the pathophysiology and treatment of bipolar disorder. *Current Opinion in Pharmacology* 7, 22–26.
- Shao L, Sun X, Xu L, Young LT, Wang JF** (2006). Mood stabilizing drug lithium increases expression of endoplasmic reticulum stress proteins in primary cultured rat cerebral cortical cells. *Life Sciences* 78, 1317–1323.
- Sheehan DV, Lecrubier Y, Sheehan KH, Amorim P, Janavs J, Weiller E, Hergueta T, Baker R, Dunbar GC** (1998). The Mini-International Neuropsychiatric Interview (M.I.N.I.): the development and validation of a structured diagnostic psychiatric interview for DSM-IV and ICD-10. *Journal of Clinical Psychiatry* 59 (Suppl. 20), 22–33, quiz 34–57.
- Shim J, Umemura T, Nothstein E, Rongo C** (2004). The unfolded protein response regulates glutamate receptor export from the endoplasmic reticulum. *Molecular Biology of the Cell* 15, 4818–4828.
- So J, Warsh JJ, Li PP** (2007). Impaired endoplasmic reticulum stress response in B-lymphoblasts from patients with bipolar-I disorder. *Biological Psychiatry* 62, 141–147.
- Stork C, Renshaw PF** (2005). Mitochondrial dysfunction in bipolar disorder: evidence from magnetic resonance spectroscopy research. *Molecular Psychiatry* 10, 900–919.
- Stranger BE, Forrest MS, Dunning M, Ingle CE, Beazley C, Thorne N, Redon R, Bird CP, de Grassi A, Lee C, et al.** (2007). Relative impact of nucleotide and copy number variation on gene expression phenotypes. *Science* 315, 848–853.
- Swift M, Swift RG** (2000). Psychiatric disorders and mutations at the Wolfram syndrome locus. *Biological Psychiatry* 47, 787–793.
- Tate CG, Whiteley E, Betenbaugh MJ** (1999). Molecular chaperones stimulate the functional expression of the cocaine-sensitive serotonin transporter. *Journal of Biological Chemistry* 274, 17551–17558.
- Toda H, Suzuki G, Nibuya M, Shioda K, Nishijima K, Wakizono T, Kanda Y, Watanabe Y, Shimizu K, Nomura S** (2006). Behavioral stress and activated serotonergic neurotransmission induce XBP-1 splicing in the rat brain. *Brain Research* 1112, 26–32.
- Tordai A, Brass LF, Gelfand EW** (1995). Tunicamycin inhibits the expression of functional thrombin receptors on human T-lymphoblastoid cells. *Biochemical and Biophysical Research Communications* 206, 857–862.
- Treiman M, Caspersen C, Christensen SB** (1998). A tool coming of age: thapsigargin as an inhibitor of sarco-endoplasmic reticulum  $Ca^{2+}$ -ATPases. *Trends in Pharmacological Sciences* 19, 131–135.
- Videbech P** (1997). MRI findings in patients with affective disorder: a meta-analysis. *Acta Psychiatrica Scandinavica* 96, 157–168.
- Warsh JJ, Andreopoulos S, Li PP** (2004). Role of intracellular calcium signaling in the pathophysiology and pharmacotherapy of bipolar disorder: current status. *Clinical Neuroscience Research* 4, 201–213.

- Wellcome Trust Case Control Consortium** (2007). Genome-wide association study of 14,000 cases of seven common diseases and 3,000 shared controls. *Nature* 447, 661–678.
- Williams RS, Cheng L, Mudge AW, Harwood AJ** (2002). A common mechanism of action for three mood-stabilizing drugs. *Nature* 417, 292–295.
- Yamamoto K, Yoshida H, Kokame K, Kaufman RJ, Mori K** (2004). Differential contributions of ATF6 and XBP1 to the activation of endoplasmic reticulum stress-responsive cis-acting elements ERSE, UPRE and ERSE-II. *Journal of Biochemistry (Tokyo)* 136, 343–350.
- Yoshida H** (2007). Unconventional splicing of XBP-1 mRNA in the unfolded protein response. *Antioxidants & Redox Signaling* 9, 2323–2333.
- Yoshida H, Matsui T, Yamamoto A, Okada T, Mori K** (2001). XBP1 mRNA is induced by ATF6 and spliced by IRE1 in response to ER stress to produce a highly active transcription factor. *Cell* 107, 881–891.
- Yoshida H, Okada T, Haze K, Yanagi H, Yura T, Negishi M, Mori K** (2000). ATF6 activated by proteolysis binds in the presence of NF-Y (CBF) directly to the cis-acting element responsible for the mammalian unfolded protein response. *Molecular and Cellular Biology* 20, 6755–6767.
- Yu Z, Luo H, Fu W, Mattson MP** (1999). The endoplasmic reticulum stress-responsive protein GRP78 protects neurons against excitotoxicity and apoptosis: suppression of oxidative stress and stabilization of calcium homeostasis. *Experimental Neurology* 155, 302–314.
- Yuan PX, Huang LD, Jiang YM, Gutkind JS, Manji HK, Chen G** (2001). The mood stabilizer valproic acid activates mitogen-activated protein kinases and promotes neurite growth. *Journal of Biological Chemistry* 276, 31674–31683.
